# Supplementary material for: Mass Spectrometry-Based Peptide Profiling of Haemolymph from Pterostichus melas Exposed to Pendimethalin Herbicide
Source: MDPI journal article supplement (doi:10.3390/molecules27144645), 2022-07-21
Supplement: s1 [file s1]

**Table S1. Predicted neuropeptides by NeuroPipred predictive tool (<https://webs.iitd.edu.in/raghava/neuropipred/>).**

| ID          | Seq                                     | Score        | Prediction | Hydrophobicity | Hydropathicity | Hydrophilicity |
|-------------|-----------------------------------------|--------------|------------|----------------|----------------|----------------|
| FAR14_SARBU | DPHHDFMRF                               | 0.32528052   | Yes        | -0.29          | -1.33          | 0.19           |
| NPF1_LEPDE  | ARGPQLRLRF                              | 0.63979152   | Yes        | -0.40          | -0.68          | 0.26           |
| ALLTR_ACRHI | GFKNVALSTARGF                           | 0.6016134    | Yes        | -0.06          | 0.23           | -0.25          |
| ADFA_TENMO  | VVNTPGHAVSYHVV                          | -1.1651769   | No         | 0.05           | 0.19           | -0.86          |
| TXS6D_CUPSA | INKYREWKNKKN                            | 0.28297396   | No         | -0.63          | -2.65          | 0.92           |
| TXS6D_CUPSA | INKYREWKNKKN                            | 0.28297396   | Yes        | -0.63          | -2.65          | 0.92           |
| PPK_SCHGR   | DGAETPGAAASLWFGPRV                      | -0.2569061   | Yes        | -0.01          | -0.02          | -0.13          |
| ALL3_RHOPR  | QVSLKYPEGKMYSFGL                        | -0.43973767  | Yes        | -0.08          | -0.31          | -0.23          |
| BOL3_BOMPE  | IKIMDILAKLGKVLAVH                       | -1.7130195   | No         | 0.08           | 1.18           | -0.27          |
| BRK_VESMC   | TATRRRRGRPPGFSPFR                       | -0.78063843  | No         | -0.47          | -1.39          | 0.51           |
| PH1_PERAM   | SDLTWTYQSPGDPTNSKN                      | 0.39367822   | Yes        | -0.27          | -1.55          | 0.10           |
| MK2B_PALPR  | VDKPDYRPRPWPRNMI                        | 0.36148854   | Yes        | -0.43          | -1.62          | 0.49           |
| LYC40_LYCSI | IASHLAFEKLSKLGSKHTML                    | -0.85372578  | No         | -0.07          | 0.14           | -0.11          |
| PAP2_SPOEX  | ENFAGGCTPGYQRTADGRCKPTF                 | -0.044915393 | No         | -0.24          | -0.91          | 0.17           |
| PA11_VESVE  | GLLPKVKLVPQISFILSTREN                   | -0.8437491   | No         | -0.16          | -0.06          | 0.10           |
| HN423_CYRHA | DCAGYMRECKEKLCCSGYVCSSRWKWCVLPA         | 1.7179663    | No         | -0.17          | -0.17          | -0.04          |
| MSPI2_MELSA | EISCEPGTTFQDKCNTCRGKDGKSAAGCTLKACPQ     | 0.79004272   | Yes        | -0.24          | -0.62          | 0.36           |
| TXC1C_CUPSA | GFGSLFKFLAKKVAKTVAQAAKQGAKYIANKQTE      | -1.1751568   | No         | -0.17          | -0.34          | 0.16           |
| TALAA_DROME | LDPTGTYYRRPRDTQDSRQKRRQDCLDPTGQY        | 0.393764     | Yes        | -0.57          | -2.07          | 0.85           |
| BX4_LOXGA   | ADSRKPDDRYDMSGNDALGDVKLATYEDNPWETFK     | 0.11494543   | Yes        | -0.33          | -1.37          | 0.68           |
| CEC_CALVI   | GWLKKIGKKIGRVGQHTRDATIQGLAVAQQAANVAATAR | -1.9190137   | No         | -0.17          | -0.26          | 0.06           |
| DIUH1_TENMO | SPTISITAPIDVLRKTWEQERARKQMVKNREFLNSLN   | 1.000674     | Yes        | -0.30          | -0.76          | 0.32           |
| LYC1_LYCSI  | GKLQAFKAKMKEIAAQTL                      | -0.91165539  | No         | -0.06          | 0.25           | -0.06          |

| ID    | Seq                                     | P   |             |                                         |   |
|-------|-----------------------------------------|-----|-------------|-----------------------------------------|---|
| seq1  | DPHHDFMRF                               | Yes | FAR14_SARBU | FMRFamide-14                            |   |
| seq2  | ARGPQLRLRF                              | Yes | NPF1_LEPDE  | Neuropeptide NPF-1                      |   |
| seq3  | GFKNVALSTARGF                           | Yes | ALLTR_ACRHI | ATRP; Allatotropin-related peptide      |   |
| seq4  | VVNTPGHAVSYHVY                          | No  | ADFA_TENMO  | Antidiuretic factor A                   |   |
| seq5  | INKYREWKNKKN                            | No  | TXS6D_CUPSA | Short cationic peptide-6d               |   |
| Seq6  | DGAETPGAAASLWFGPRV-amide                | Yes | PPK_SCHGR   | Pyrokinin, Capa-Pk, Scg-PVK-3           | + |
| Seq7  | QVSLKYPEGKMYSFGL                        | Yes | ALL3_RHOPR  | Allatostatin-3, Rhopr-AST-3             |   |
| Seq8  | IKIMDILAKLGKVLAHV                       | No  | BOL3_BOMPE  | Bombolitin-3                            | + |
| Seq9  | TATRRRRGRPPGFSPFR                       | No  | BRK_VESMC   | Vespulakinin-1                          | + |
| Seq10 | SDLTWTYQSPGDPTNSKN                      | Yes | PH1_PERAM   | Peptide hormone 1                       |   |
| Seq11 | VDKPDYRPRWP RNMI                        | Yes | MK2B_PALPR  | Metalnikowin-2B                         | + |
| seq12 | IASHLAFEKLSKLGSKHTML                    | No  | LYC40_LYCSI | M-lycotoxin-Ls4a                        |   |
| seq13 | ENFAGGCTPGYQRTADGRCKPTF                 | No  | PAP2_SPOEX  | Paralytic peptide 2                     | + |
| seq14 | GLLPKVKLVEQISFILSTREN R                 | No  | PA11_VESVE  | Phospholipase A1 verutoxin-1 (Fragment) | + |
| seq15 | DCAGYMRECKEKLCCSGYVCSSRWKWCVLPAP        | No  | HN423_CYRHA | U3-theraphotoxin-Hhn1r                  |   |
| seq16 | EISCEPGTTFQDKCNTCRCGKDGKSAAGCTLKACPQ    | Yes | MSPI2_MELSA | Serine protease inhibitor 2             |   |
| seq17 | GFGLFKFLAKKVAKTVAKQAAKQGAKYIANKQTE      | No  | TXC1C_CUPSA | Cupiennin-1c                            |   |
| Seq18 | LDPTGTYRRPRDTQDSRQKRRQDCLDPTGQY         | Yes | TALAA_DROME | Peptide tarsal-less AA                  |   |
| Seq19 | ADSRKPDDRYDMSGNDALGDVKLATYEDNPWETFK     | Yes | BX4_LOXGA   | Dermonecrotic toxin LgSicTox-beta-LOXN4 | + |
| Seq20 | GWLKKIGKKIGRVGQHTRDATIQGLAVAQQAANVAATAR | No  | CEC_CALVI   | Cecropin                                |   |
| seq21 | SPTISITAPIDVLRKTWEQERARKQMVKNREFLNSLN   | Yes | DIUH1_TENMO | Diuretic hormone 1                      |   |
